# Supplementary material for: Sialyltransferase Inhibitor Ac53FaxNeu5Ac Reverts the Malignant Phenotype of Pancreatic Cancer Cells, and Reduces Tumor Volume and Favors T-Cell Infiltrates in Mice
Source: MDPI journal article supplement (doi:10.3390/cancers14246133), 2022-12-12
Supplement: s1 [file s1]

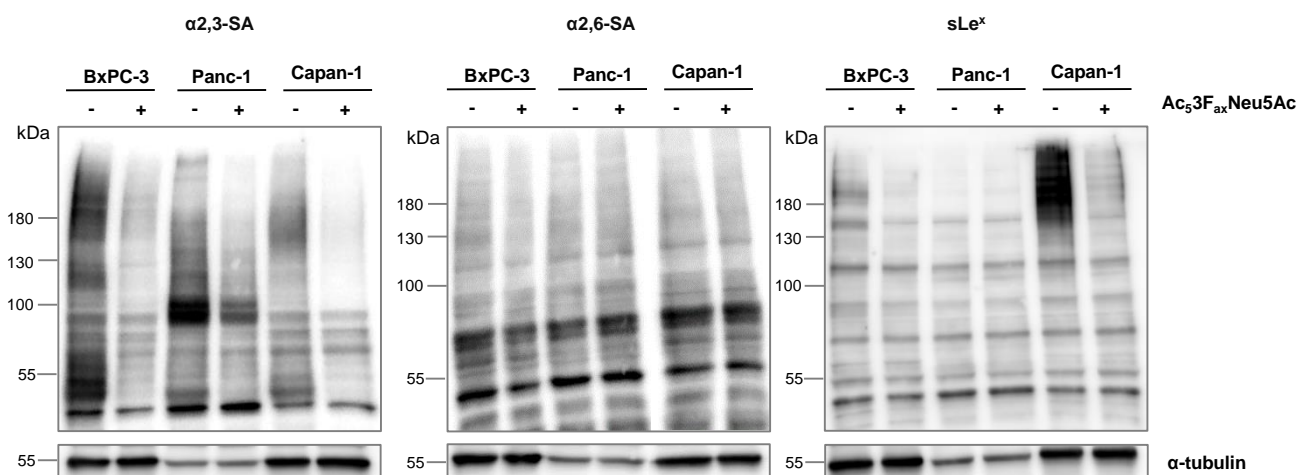

**Supplementary Figure S1. Analysis of Ac<sub>5</sub>3F<sub>ax</sub>Neu5Ac effect on cell sialylation in BxPC-3, Capan-1 and Panc-1 cells by WB.** Representative blots of the expression of the sialylated glycan structures  $\alpha 2,3$ -SA,  $\alpha 2,6$ -SA and  $sLe^x$  from the cell lysates of treated and control BxPC-3, Capan-1 and Panc-1 cells (top). Immunodetection of tubulin after stripping of the membranes, as loading control (bottom).
