# Supplementary figures and images for: Sialyltransferase Inhibitor Ac53FaxNeu5Ac Reverts the Malignant Phenotype of Pancreatic Cancer Cells, and Reduces Tumor Volume and Favors T-Cell Infiltrates in Mice
Source: MDPI journal article supplement (doi:10.3390/cancers14246133), 2022-12-12

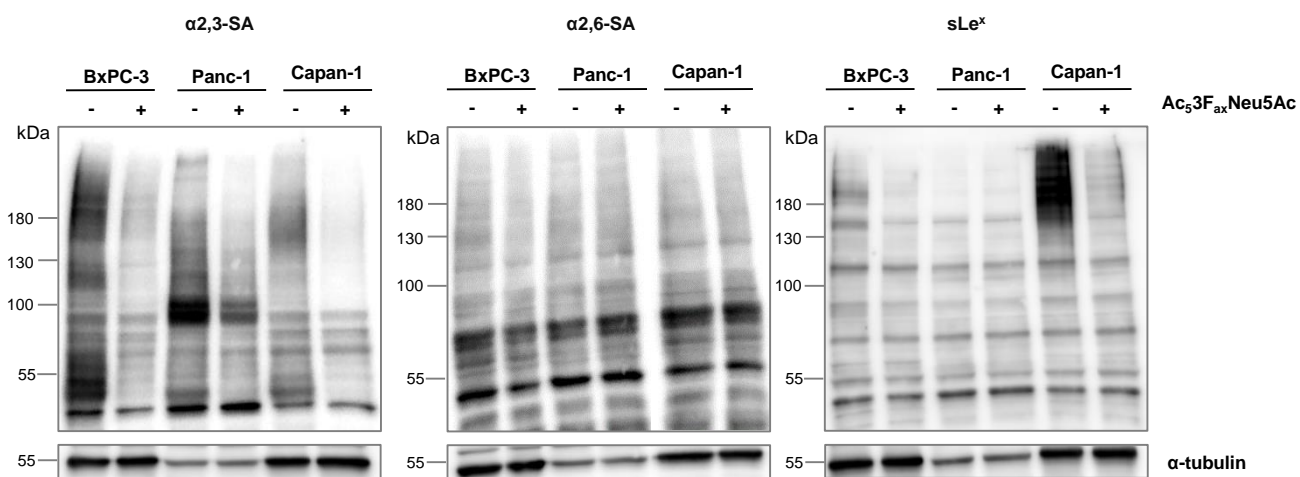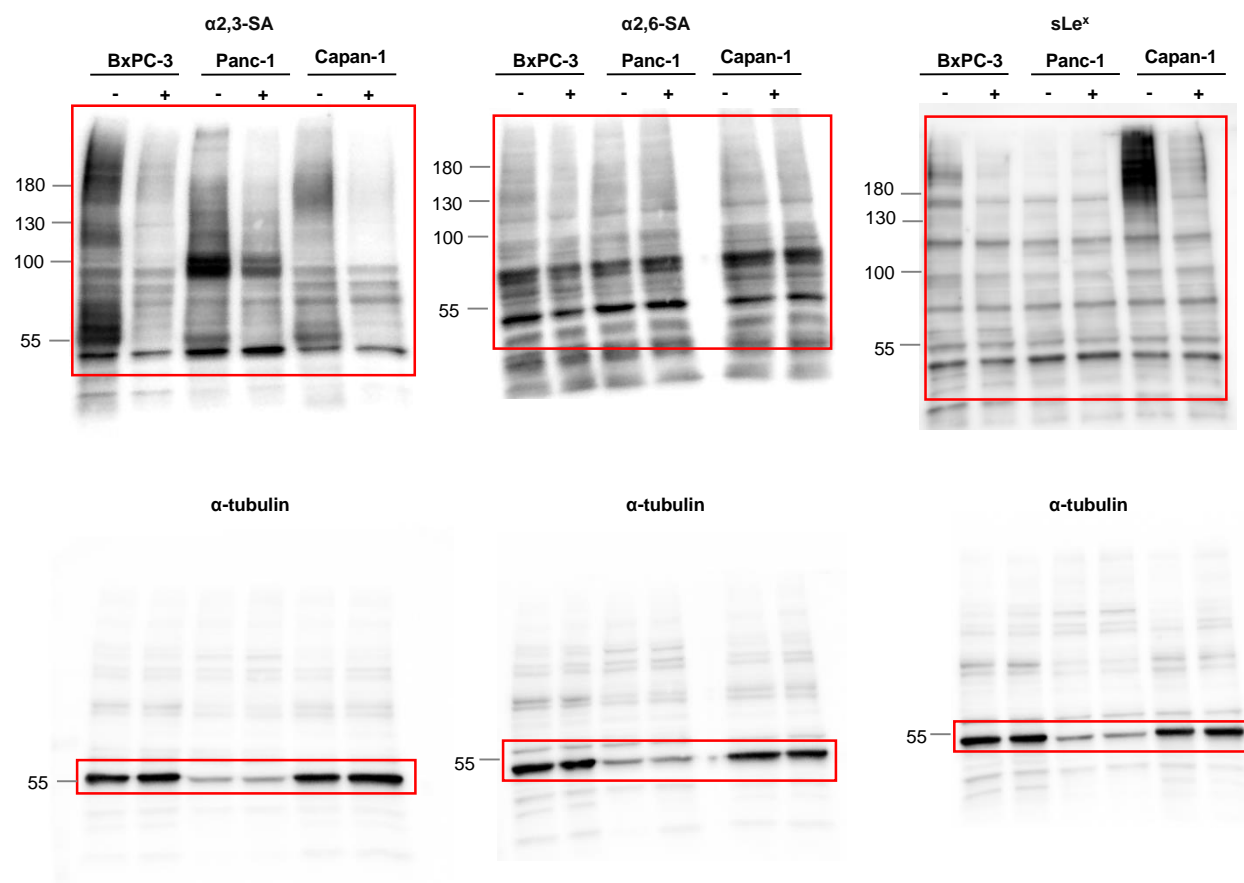

Supplement: s1 [file s1]
